# Supplementary material for: Treatment Nonadherence among Multimorbid Chronic Disease Patients: Evidence from 3515 Subjects in Indonesia
Source: MDPI journal article supplement (doi:10.3390/medicina60040634), 2024-04-15
Supplement: s1 [file s1]

# **Treatment Nonadherence among Multimorbid Chronic Disease Patients: Evidence from 3,515 Subjects in Indonesia**

Ivan Surya Pradipta, Kevin Aprilio, Yozi Fiedya Ningsih, Mochammad Andhika Aji Pratama,  
Sofa Dewi Alfian, Rizky Abdulah

**Table S1.** Operational definition of variables

| <b>No.</b>      | <b>Variables</b>        | <b>Definition</b>                                                                                                                                                                                             |
|-----------------|-------------------------|---------------------------------------------------------------------------------------------------------------------------------------------------------------------------------------------------------------|
| <b>Exposure</b> |                         |                                                                                                                                                                                                               |
| 1.              | Sex                     | Biological characteristic of subjects. This variable was classified into male and female.                                                                                                                     |
| 2.              | Age                     | Age of subjects during the IFLS-5 study. In this study, this variable was classified into < 15 years, 15-65 years, and > 65 years.                                                                            |
| 3.              | Formal education        | Subject's completion of any formal education based on Indonesian education system. In this study, this variable was classified into schooled and unschooled.                                                  |
| 4.              | Ethnicity               | Subject's self-identified ethnicity identity. In this study, this variable was classified into Javanese and non-Javanese.                                                                                     |
| 5.              | Geographical residence  | Geographical location of subject's residence during the IFLS-5 study. This variable was measured by subject's provincial location of residence and classified in this study into Java and non-Java residence. |
| 6.              | Demographical residence | Demographical condition of the subject's residence during the IFLS-5 study. This variable was classified into rural and urban residence.                                                                      |
| 7.              | Household size          | Total number of household members in a subject's residence. In this study, this variable was classified into 1 person (i.e., living alone), 2-6 people, and > 6 people.                                       |

|     |                                      |                                                                                                                                                                                                                                                                                                                                                                                                                                                                                                                  |
|-----|--------------------------------------|------------------------------------------------------------------------------------------------------------------------------------------------------------------------------------------------------------------------------------------------------------------------------------------------------------------------------------------------------------------------------------------------------------------------------------------------------------------------------------------------------------------|
| 8.  | Annual income                        | Total annual earnings of each subject in Indonesian Rupiah (IDR). In this study, this variable was classified into not working (i.e., having no income), < 40 million, 40-100 million, and > 100 million.                                                                                                                                                                                                                                                                                                        |
| 9.  | Health insurance ownership           | Subject's participation or ownership of public and/or private health insurance program/policy.                                                                                                                                                                                                                                                                                                                                                                                                                   |
| 10. | Current self-perceived health status | Subject's observation of their health condition during the IFLS-5 study. This variable was measured with the question " <i>In general, how is your health?</i> ", with responses being very healthy; somewhat healthy; somewhat unhealthy; and very unhealthy. In this study, this variable was classified to unhealthy (somewhat unhealthy and very unhealthy) and healthy (very healthy and somewhat healthy).                                                                                                 |
|     | Future self-perceived health status  | Subject's observation of their health condition during the IFLS-5 study. This variable was measured with the question " <i>In general, how would you expect your health in the next year compared to now?</i> ", with responses being very healthier; somewhat healthier; about the same; somewhat unhealthier; and very unhealthier. In this study, this variable was classified to unhealthy (somewhat unhealthier and very unhealthier) and healthy (about the same, somewhat healthier, and very healthier). |
| 11. | Active days missed in the last month | The number of days in the last month of the IFLS-5 study in which a subject misses their primary daily activities due to poor health. This variable was measured with the question " <i>During the last 4 weeks, how many days of your primary activities did you miss due to poor health?</i> ", with responses classified in this study into $\leq 7$ days and $> 7$ days.                                                                                                                                     |
| 12. | Depressive symptoms                  | Subject's symptoms of depression aside from clinical diagnosis. This variable was measured using the Center for Epidemiologic Studies Depression Scale (CES-D) questionnaire. This variable was classified into not having depressive symptoms and having depressive symptoms.                                                                                                                                                                                                                                   |
| 13. | Body mass index                      | Calculation of subject's body mass index (BMI). Subject's height and weight was measured with Seca plastic height board 213 to the                                                                                                                                                                                                                                                                                                                                                                               |

|                |                        |                                                                                                                                                                                                                                                                                                                                                                                                                                                                                                                                                                                                                                                |
|----------------|------------------------|------------------------------------------------------------------------------------------------------------------------------------------------------------------------------------------------------------------------------------------------------------------------------------------------------------------------------------------------------------------------------------------------------------------------------------------------------------------------------------------------------------------------------------------------------------------------------------------------------------------------------------------------|
|                |                        | nearest millimeter and Camry EB1003 to the nearest tenth of a kilogram, respectively. This variable was classified into obese, overweight, normal, and underweight BMI.                                                                                                                                                                                                                                                                                                                                                                                                                                                                        |
| 14.            | Smoking behavior       | Tobacco consumption behavior of subject prior to and during the IFLS-5 study. This variable was measured with two questions: “ <i>Have you ever chewed tobacco, smoked a pipe, smoked self-rolled cigarettes, or smoked cigarettes/cigars?</i> ” and “ <i>Do you still have the habit or have you totally quit?</i> ”, with responses classified in this study into non-smoker; ex-smoker; and active smoker.                                                                                                                                                                                                                                  |
| <b>Outcome</b> |                        |                                                                                                                                                                                                                                                                                                                                                                                                                                                                                                                                                                                                                                                |
| 15.            | Treatment nonadherence | <p>Subject’s treatment for each chronic disease, including: hypertension, digestive diseases, arthritis, hypercholesterolemia, diabetes mellitus, asthma, cardiovascular diseases, other lung diseases, kidney diseases, stroke, tuberculosis, liver diseases, cancer or other malignancies, prostate disease, memory-related diseases, and psychiatric diseases.</p> <p>This variable was measured with a question “<i>Are you taking [types of treatment] to treat [types of chronic disease] and its complications?</i>”. Subjects reporting no treatment for any of the chronic diseases were classified in this study as nonadherent.</p> |

**Table S2.** STROBE statement checklist for cross-sectional studies

| Section                   | Item no. | Recommendation                                                                                      | Page no. |
|---------------------------|----------|-----------------------------------------------------------------------------------------------------|----------|
| <b>Title and abstract</b> |          |                                                                                                     |          |
|                           | 1.       | (a) Indicate the study’s design with a commonly used term in the title or the abstract              | 1        |
|                           |          | (b) Provide in the abstract an informative and balanced summary of what was done and what was found | 1        |
| <b>Introduction</b>       |          |                                                                                                     |          |
| Background or             | 2.       | Explain the scientific background and rationale for the                                             | 1-2      |

|                             |     |                                                                                                                                                                                       |                  |
|-----------------------------|-----|---------------------------------------------------------------------------------------------------------------------------------------------------------------------------------------|------------------|
| rationale                   |     | investigation being reported                                                                                                                                                          |                  |
| Objectives                  | 3.  | State specific objectives, including any prespecified hypotheses                                                                                                                      | 1-2              |
| <b>Methods</b>              |     |                                                                                                                                                                                       |                  |
| Study design                | 4.  | Present key elements of study design early in the paper                                                                                                                               | 2-3              |
| Setting                     | 5.  | Describe the setting, locations, and relevant dates, including periods of recruitment, exposure, follow-up, and data collection.                                                      | 2                |
| Participants                | 6.  | Give the eligibility criteria, and the sources and methods of selection for participants                                                                                              | 2-3              |
| Variables                   | 7.  | Clearly define all outcomes, exposures, predictors, potential confounders, and effect modifiers. Give diagnostic criteria, if applicable.                                             | 2-3<br>Table S1* |
| Data sources or measurement | 8.  | For each variable of interest, give sources of data and details of methods of assessment (measurement). Describe comparability of assessment methods of there is more than one group. | Table S1*        |
| Bias                        | 9.  | Describe any efforts to address potential sources of bias                                                                                                                             | N/A              |
| Study size                  | 10. | Explain how the study size was arrived at                                                                                                                                             | 3-4<br>Figure 1  |
| Quantitative variables      | 11. | Explain how quantitative variables were handled in the analyses. If applicable, describe which groupings were chosen and why                                                          | Table S1*        |
| Statistical methods         | 12. | (a) Describe all statistical methods, including those used to control for confounding                                                                                                 | 3                |
|                             |     | (b) Describe any methods used to examine subgroups and interactions                                                                                                                   | N/A              |
|                             |     | (c) Explain how missing data were addressed                                                                                                                                           | 3                |
|                             |     | (d) If applicable, describe analytical methods taking account of sampling strategy                                                                                                    | N/A              |

|                   |     |                                                                                                                                                                                                               |                                       |
|-------------------|-----|---------------------------------------------------------------------------------------------------------------------------------------------------------------------------------------------------------------|---------------------------------------|
|                   |     | (e) Describe any sensitivity analyses                                                                                                                                                                         | N/A                                   |
| <b>Results</b>    |     |                                                                                                                                                                                                               |                                       |
| Participants      | 13. | (a) Report numbers of individuals at each stage of study—eg numbers potentially eligible, examined for eligibility, confirmed eligible, included in the study, completing follow-up, and analysed             | 3-4<br>Figure 1                       |
|                   |     | (b) Give reasons for non-participation at each stage                                                                                                                                                          | 3-4<br>Figure 1                       |
|                   |     | (c) Consider use of a flow diagram                                                                                                                                                                            | Figure 1                              |
| Descriptive data  | 14. | (a) Give characteristics of study participants (eg demographic, clinical, social) and information on exposures and potential confounders                                                                      | 3-6<br>Figure 2<br>Table 1<br>Table 2 |
|                   |     | (b) Indicate number of participants with missing data for each variable of interest                                                                                                                           | 5-6<br>Table 2                        |
| Outcome data      | 15. | Report numbers of outcome events or summary measures                                                                                                                                                          | 3-6<br>Figure 2<br>Table 2            |
| Main results      | 16. | (a) Give unadjusted estimates and, if applicable, confounder-adjusted estimates and their precision (eg, 95% confidence interval). Make clear which confounders were adjusted for and why they were included. | 6-7<br>Table 3                        |
|                   |     | (b) Report category boundaries when continuous variables were categorized                                                                                                                                     | Table S1*                             |
|                   |     | (c) If relevant, consider translating estimates of relative risk into absolute risk for a meaningful time period                                                                                              | N/A                                   |
| Other analyses    | 17. | Report other analyses done—eg analyses of subgroup interactions, and sensitivity analyses                                                                                                                     | N/A                                   |
| <b>Discussion</b> |     |                                                                                                                                                                                                               |                                       |

|                   |     |                                                                                                                                                                            |      |
|-------------------|-----|----------------------------------------------------------------------------------------------------------------------------------------------------------------------------|------|
| Key results       | 18. | Summarize key results with reference to study objectives                                                                                                                   | 7    |
| Limitation        | 19. | Discuss limitations of the study, taking into account sources of potential bias or imprecision. Discuss both direction and magnitude of any potential bias                 | 7    |
|                   | 20. | Give a cautious overall interpretation of results considering objectives, limitations, multiplicity of analyses, results from similar studies, and other relevant evidence | 7-10 |
| Generalizability  | 21. | Discuss the generalizability (external validity) of the study results                                                                                                      | 9-10 |
| Other information |     |                                                                                                                                                                            |      |
| Funding           | 22. | Give the source of funding and the role of the funders for the present study and, if applicable, for the original study on which the present article is based.             | 10   |

Note: \* = sources from supplementary materials; N/A = not applicable or conducted.
